# Supplementary material
Source: publisher figshare collection journal article supplement (https://tandf.figshare.com/articles/dataset/_/1301495)
Supplement: Supplementary file 1 [file 2]

Spatial and seasonal variations of CO2 flux, and photosynthetic and respiratory parameters of larch forests in East Asia

Kentaro TAKAGI1 (kentt@fsc.hokudai.ac.jp), Ryuichi HIRATA2 (hirata.ryuichi@nies.go.jp), Reiko IDE2 (ide.reiko@nies.go.jp), Masahito UEYAMA3 (miyabi-flux@muh.biglobe.ne.jp), Kazuhito ICHII4 (ichii@jamstec.go.jp), Nobuko SAIGUSA2 (n.saigusa@nies.go.jp), Takashi HIRANO5 (hirano@env.agr.hokudai.ac.jp), Jun ASANUMA6 (asanuma@suiri.tsukuba.ac.jp), Sheng-Gong LI7 (lisg@igsnrr.ac.cn), Takashi MACHIMURA8 (mach@see.eng.osaka-u.ac.jp), Yuichiro NAKAI9 (nakaiyui@ffpri.affrc.go.jp), Takeshi OHTA10 (takeshi@agr.nagoya-u.ac.jp), Yoshiyuki TAKAHASHI2 (yoshiyu@nies.go.jp)

1 Teshio Experimental Forest, Field Science Center for Northern Biosphere, Hokkaido University, Horonobe 098-2943, Japan

2 Center for Global Environmental Research, National Institute for Environmental Studies, Tsukuba 305-8506, Japan

3 Graduate School of Life and Environmental Sciences, Osaka Prefecture University, Sakai 599-8531, Japan

4 Department of Environmental Geochemical Cycle Research, Japan Agency for Marine-Earth Science and Technology, Yokohama 236-0001, Japan

5 Research Faculty of Agriculture, Hokkaido University, Sapporo 060-8589, Japan

6 Terrestrial Environment Research Center, University of Tsukuba, Tsukuba 305-8577, Japan

7 Key Laboratory of Ecosystem Network Observation and Modeling, Institute of Geographic Sciences and Natural Resources Research, Chinese Academy of Sciences, Beijing 100101, China

8 Graduate School of Engineering, Osaka University, 2-1 Yamadaoka, Suita, Osaka 565-0871, Japan

9 Forestry and Forest Products Research Institute, 1 Matsunosato, Tsukuba 305-8687, Japan

10 Graduate School of Bioagricultural Sciences, Nagoya University, Nagoya 464-8601, Japan

**Corresponding author:** Kentaro Takagi, Teshio Experimental Forest, Field Science Center for Northern Biosphere, Hokkaido University, Toikanbetsu, Horonobe 098-2943, Japan

Phone: +81-1632-6-5211

Fax: +81-1632-6-5003

E-mail: kentt@fsc.hokudai.ac.jp

**Type of contribution:** Full-length paper

**Running title:** Ecophysiological parameters of larch forests

**Abstract**

Larch forests are predominantly distributed across high latitudes of Eurasia. They potentially have a strong influence on the terrestrial carbon and energy cycles, because of their vast area and large carbon stocks in their peat soils in the permafrost. In this study, we elucidated intersite variation of ecosystem photosynthetic and respiratory parameters of eight larch forests in East Asia using the CarboEastAsia carbon flux and micrometeorology dataset. These parameters were determined by using the empirical relationship between the carbon fluxes (photosynthesis and respiration) and micrometeorological variables (light and temperature). In addition, we examined leaf area index (LAI) determined by Moderate Resolution Imaging Spectroradiometer (MODIS) remote sensing data to explain the intersite variation. Linear or exponential relationships with annual mean temperature or seasonal maximum LAI at the study sites were found for the annual carbon fluxes (gross primary production [GPP] and total ecosystem respiration [RE]) as well as for four of the five seasonal maximum values of determined photosynthetic and respiratory parameters (maximum GPP at light saturation, initial slope of the light-response curve, daytime respiration, and RE at the reference temperature of 10ºC). Phenological indices, such as start day of the growing season, growing season length, and growing season degree days explained much of the intersite variation of GPP and RE of the studied larch forests, however the relationship between MODIS LAI and photosynthetic or respiratory parameters implies that the intersite variation in GPP and RE was caused not only by the temperature variation (abiotic factor), but also by the variation in the photosynthetic and respiration activity by vegetation (biotic factor) through the change in leaf (or whole vegetation) biomass. Our analysis shows that MODIS LAI serves as a good index to explain the variation of the ecosystem photosynthetic and respiratory characteristics of East Asian larch forests.

**Key words**: *Larix*, leaf area index, MODIS, photosynthesis, respiration

**1. Introduction**

Larch forests are characterized by their deciduous habit, a trait that allows them to endure the extremely cold and dry winters across high latitudes of Eurasia, including the Siberian taiga (Gower and Richards 1990). These forests are considered to have a strong influence on the terrestrial carbon and energy cycles, because of their vast area and potentially large carbon stocks in their peat soils in the permafrost (Schulze et al. 1999; Dolman et al. 2004; Ueyama et al. 2010). Siberian forests constitute 20% of the world’s forested area (Dolman et al. 2004), and larch forests cover 37% (Abaimov et al. 1998), 70% (Gunin et al. 1999), and 13.6% (Jiang and Zhou 2002) of forested areas in Russia, Mongolia, and China, respectively. Larch forests on the permafrost region are considered to be a vulnerable ecosystem, because of the rapid warming during the past few decades due to climate change (Dolman et al. 2008) and irreversible degradation by permafrost melting (Demek 1994). *Larix* species also have been planted intensively throughout northern Japan and China, because of their high cold tolerance and timber productivity (Hirata et al. 2007). For these reasons, it is important to gain a comprehensive understanding of the carbon and energy exchange characteristics of larch forests (Li et al. 2005; Machimura et al. 2005; Wang et al. 2005b; Hirata et al. 2007; Nakai et al. 2008; Ohta et al. 2008).

In this synthesis study, we aimed to elucidate the spatial variation of the ecosystem photosynthetic and respiratory characteristics of larch forests in East Asia using the CarboEastAsia carbon flux dataset (Saigusa et al. 2013) and additional data obtained at two other larch forest sites (Neleger, Russia, and Fuji Hokuroku Flux Observation Site, Japan). Several previous studies were able to explain the spatial variation of carbon fluxes such as gross primary production (GPP), total ecosystem respiration (RE), and net ecosystem CO2 exchange (NEE) in East Asian Forests by using temperature and precipitation as the explanatory variables (Hirata et al. 2008; Chen et al. 2013; Saigusa et al. 2013). However, because GPP, RE, and NEE are the products of abiotic (environment) and biotic (vegetation) factors, in this study we evaluated the biotic characteristics by inversely estimating photosynthetic and respiratory parameters based on carbon flux and micrometeorology datasets, as well as explain their intersite variation of GPP, RE, and NEE. Several studies have succeeded in relating the spatial variation in photosynthetic and respiratory parameters to environmental and plant functional indices and applying that relationship to develop semi-empirical models to estimate terrestrial carbon cycles at large scale from micrometeorology data (Saito et al. 2009; Groenendijk et al. 2011a, 2011b) or the vegetation indices (Ide et al. 2010). Our study uses similar approaches and is the first step to develop a semi-empirical model to estimate carbon cycles in larch forests in East Asia. We used Moderate Resolution Imaging Spectroradiometer (MODIS) LAI product (MOD15A2 Collection 5; Myneni et al. 2002) for the vegetation index to explain the intersite variations of carbon fluxes and their photosynthetic and respiratory parameters, because it can be a universal index reflecting the vegetation structure and the magnitude of the stand biomass, and can be obtained at every larch forest with short interval period.

**2. Materials and Methods**

**2.1 Site description**

CO2 flux and micrometeorology data obtained at eight larch forest sites distributed over East Asia were used for the analysis (Fig. 1; Table 1). Three Russian sites (TUR, NLG, YLF) and SKT in Mongolia are naturally regenerated forests, whereas three Japanese sites (TSE, TMK, FHK) and LSH in northeastern China are artificial plantations. These sites belong to the AsiaFlux network (Mizoguchi et al. 2009) and cover a broad range of climatic values, with total annual precipitation ranging from 249 mm (NLG) to 1800 mm (FHK) and annual mean air temperatures from –9.4 ºC (NLG) to 9.2ºC (FHK). Sites TUR, NLG, and YLF are characterized by a severe continental boreal climate with cold winters and short, warm, dry summers, and the permafrost soil has an active layer depth of about 1–1.2 m. Site SKT is characterized by a sub-boreal continental climate with cold winters and hot and dry summers. A temperate monsoon climate dominates the LSH site, which has much more precipitation during the summer than that of SKT. Sites TSE, TMK, and FHK are characterized by a cool-temperate climate with a warm summer and snow cover in winter, although TSE has much more snow accumulation and colder winters than the other two sites.

TUR is a uniformly aged (105 yr) *Larix gmelinii* forest located in Tura in the Evenkia Autonomous District in central Siberia (Nakai et al. 2008). The stand density of living *L*. *gmelinii* is 5500 trees ha–1, and the mean height is 3.4 m. The ground surface is covered densely with lichens and mosses, and the understory is comprised of woody shrubs of *Betula* *nana*, *Ledum palustre*, *Vaccinium uliginosum*, and *Vaccinium* *vitis-idaea* with height <1.5 m. The soil type is Cryosol, and the permafrost table is within 1 m depth.

YLF is a *Larix cajanderi* forest located approximately 20 km north of Yakutsk in eastern Siberia (Ohta et al. 2001, 2008), where there is continuous permafrost and the active layer is approximately 1.2 m deep. The larch trees have a stand density of 840 trees ha–1 and a mean stand height of 18 m. *Betula platyphylla* dominates the understory, and the forest floor is fully covered by *V.* *vitis-idaea*.

NLG is a *L. cajanderi* forest located about 25 km northwest of Yakutsk (Machimura et al. 2005, 2008). The forest is on continuous permafrost, with an active layer depth of approximately 1.0 m. The average and maximum tree heights are 8.6 and 21 m, respectively, and the density is 2100 trees ha−1. The forest floor is covered with mosses and shrubs including *V.* *vitis-idaea*, *V. uliginosum*, and *Pyrola incarnata*. Soil texture is loamy, and soil organic carbon content in the top 1-m layer was 13.2 kg C m−2 (Sawamoto et al. 2003).

SKT is a *Larix sibirica* forest, mixed with scattered or patchy *B.* *platyphylla* trees in some places. It is on a southwest-facing gently sloping hill of the Khentii Mountains located about 25 km northeast of the Mongonmorit village in the Tov province of Mongolia (Li et al. 2005). The mean stand height and density are 20 m and 1120 trees ha−1, respectively. The dense understory forms a distinct layer of grasses and scattered shrubs. The grasses are dominated by *Carex* spp., *Koeleria* spp., and *Chamaenerion angustifolium*, and the dominant shrub is *Potentilla fruticosa*. The forest experienced a large-scale fire in 1996–1997, and approximately 37.5% of the trees have fire scars on the trunks. In addition, there were tree stumps of 570 ha−1 left after timber harvesting during the last three decades. As a result of these disturbances, the age structure of the forest spanned from 70 to >150 yr old, with the oldest trees >300 yr. The soil is a seasonal Cryosol with a coarse texture that is highly leached and gray in color.

LSH is a *L. gmelinii* plantation in northeastern China (Wang et al. 2005a, 2005b). The forest was established in 1969 on a complex terrain, and some broadleaf species (e.g., *B. platyphylla* and *Fraxinus mandshurica*) are sparsely distributed throughout the canopy. The mean canopy height is about 17 m. Shrub species such as *Ulmus propinqua*, *Corylus heterophylla*, and *Lonicera ruprechtiana* grow in the forest. The soil is classified as a typical dark brown forest soil.

TSE is a young hybrid larch (*L. gmelinii × Larix kaempferi*) plantation located in northernmost Hokkaido, in northern Japan (Takagi et al. 2009). After clear-cutting of trees covering an area of 13.7 ha and strip-cutting the former dense undergrowth of *Sasa senanensis* and *Sasa kurilensis* into alternating 4-m-wide cut and uncut rows in the clear-cut area in 2003, 2-yr-old hybrid larch was planted in the strip-cut rows at a density of 2500 saplings ha–1. In 2011, the mean heights of larch and *Sasa* were 3.5 and 1.5 m, respectively, and the Leaf are index (LAI) values were 1.7 and 6.7 m2 m−2 at the seasonal maximum, showing the minor contribution of larch to the whole forest leaf area. The soil is a Gleyic Cambisol, and its surface organic horizon is about 10 cm thick.

TMK is a Japanese larch (*L. kaempferi*) plantation located 15 km northwest of Tomakomai, Hokkaido, Japan (Hirano et al. 2003; Hirata et al. 2007). Trees were about 45 yr old at the time of the measurement. The forest includes scattered deciduous broadleaf trees (*Betula ermanii*, *B. platyphylla*, and *Ulmus japonica*) and spruce (*Picea jezoensis*), with dense understory of ferns (*Dryopteris crassirhizoma* and *Dryopteris austriaca*). In 1999, the canopy height was about 15 m and the stand densities were 673, 459, 18, and 1150 trees ha−1, respectively, for larch, broadleaf trees, spruce, and all species. The soil is a volcanogenic Regosol with 1- to 2-cm thick fresh litter and a 5- to 10-cm thick decomposed organic layer.

FHK is another Japanese larch (*L. kaempferi*) plantation located at the northern foot of Mt. Fuji in central Japan (Ueyama et al. 2012). The stand age was 45–50 yr old at the time of the measurement. The forest includes scattered coniferous trees (*Pinus densiflora* and *Abies homolepis*) with an understory of shrubs (*Prunus incisa*). The canopy height was about 22 m, and the stand density was 433 trees ha−1.

**2.2 Calculation of net ecosystem CO2 exchange**

We used 15 sites × years data of 30-min NEE for this study (Table 2). NEE was calculated as the sum of the eddy CO2 flux (*F*c) and the CO2 storage change in the air column below the flux measurement height (*F*s), although *F*c was measured directly as NEE at YLF and TSE because of the limitation of the instruments and short vegetation after clear-cutting, respectively. *F*c was measured using the eddy covariance technique with 3D-sonic anemometer-thermometers and open-path (TUR, NLG, YLF, SKT) or closed-path (LSH, TSE, TMK, FHK) infrared gas analyzers. Measurement systems and calculation protocols were based on EUROFLUX methodology (Aubinet et al. 2000). The CO2 storage change was evaluated using the vertical profile of the atmospheric CO2 concentration (NLG, TMK, FHK) or a single height measurement of CO2 concentration at the *F*c measurement height (TUR, SKT, LSH). The instruments and features for the calculation are listed in Table 2. Because of the severe winter climate, the flux was measured only from day of the year (DOY) 156 to 255 at TUR; from DOY 97 to 283 at YLF; and from DOY 104 to 282 (in 2003), DOY 122 to 274 (in 2004), and DOY 168 to 270 (in 2005) at NLG.

**2.3 Quality control, gap filling of net ecosystem CO2 exchange, and flux partitioning**

Quality control procedures were applied by each principal investigator of the site; these included the removal of spikes, performing tests on 10-Hz data (Vickers and Mahrt 1997) and instationarity ratio and integral turbulence characteristics tests (Foken and Wichura 1996), as well as footprint analysis (Kormann and Meixner 2001). Features of the quality control procedures are shown in Table 2.

Friction velocity (*u**) filtering was applied to the quality-assured nighttime NEE data. The *u** threshold was determined for each site and year according to the procedures proposed by Papale et al. (2006), but the highest values among years (Table 2) were used throughout the entire study period for sites with multiyear data.

Gaps in the remaining NEE data after *u** filtration were filled, and the GPP and RE were determined by using an online server (http://www.bgc-jena.mpg.de/bgc-mdi/html/eddyproc/) for gap-filling and flux-partitioning calculation (Reichstein et al. 2005; Papale et al. 2006; Takagi et al. 2007), which is the basic procedure of FLUXNET synthesis activity. The FLUXNET gap-filling strategy is a combination of several filling methods proposed by Falge et al. (2001), which primarily adopts lookup tables, where bin-averaged NEE for similar air temperature, vapor pressure deficit, and solar radiation ranges is calculated within a time-window of ± 7 days (or 14 days, if no similar meteorological conditions are present within the 7 days window). If none of these meteorological data are present, missing NEE value is replaced by the average value at the same time of the day. Refer Appendix A in Reichstein et al. (2005) for more detail. Nighttime NEE can be assumed to be equivalent to RE, thus for the determination of RE, 30-min nighttime NEE (NEEnight) within a 15-day moving window (10-day overlap) was related to the air temperature using the Lloyd and Taylor (1994) equation as,

where *R*10 is RE (μmol m−2 s−1) at the reference temperature (*T*r: 283.15 K), *E*a is the apparent temperature sensitivity (J mol−1), *R* is the universal gas constant (8.314 J mol−1 K−1), *T*a is the air temperature (K), and *T*0 is 227.13 K. The coefficient *R*10 was determined every 5 days as the time variable, whereas *E*a was determined as a constant for each year, and daytime RE was estimated every 30 min using this equation and air temperature at that time. GPP was calculated as RE − NEE. GPP and RE were calculated every 30 min, and the daily or annual sum was used for the following analyses. Owing to the limited measurement period under severe winter climate at the three Russian sites, gap-filled NEE, GPP, and RE were determined for DOY 97 to 257 at TUR; DOY 45 to 333 at YLF; and DOY 45 to 341 (in 2003), DOY 63 to 333 (in 2004), and DOY 173 to 329 (in 2005) at NLG. These were then used as annual values. This treatment would decrease the annual sum of RE, thus increase the annual NEE, although the magnitude would not be significant because of the small respiration rate during the severe winter.

**2.4 Determination of ecosystem photosynthetic and respiratory parameters**

Photosynthetic parameters, the maximum GPP at light saturation (*A*max: μmol m−2 s−1), initial slope of the light-response curve (: mol mol−1), and daytime respiration (*R*d: μmol m−2 s−1) as the y-intercept of the light-response curve (equation 2), were determined every day by the least-squares method using daytime (*Q*  10 µmol m–2 s–1) 30-min NEE (quality controlled but not gap filled) and *Q* data within a 15-day moving window:

where *Q* is the photosynthetic photon flux density (μmol m−2 s−1) and θ is the convexity of the light-response curve. We used a fixed value (0.9) for θ to apply the least-squares method.

We used the same equation (1) for the determination of respiratory parameters, the apparent temperature sensitivity (*E*a) and RE at the reference temperature of 10ºC (*R*10), but were determined every day by the least-squares method using nighttime (*Q* < 10 µmol m–2 s–1) 30-min NEE (quality controlled with *u** filtration but not gap filled) and *T*a data within a 29-day moving window.

**2.5 LAI data and phenological parameters**

Moderate Resolution Imaging Spectroradiometer (MODIS) LAI product (MOD15A2 Collection 5; Myneni et al. 2002) was used as LAI in each site to explain the intersite variations of carbon fluxes and their photosynthetic and respiratory parameters, because MODIS LAI includes the effect of understory leaves when it is estimated based on the radiative transfer theory (Myneni et al. 2002) and the methods of on-site LAI observation were site specific; some sites used plant area index including the shades by the stems, branches, and culms in addition to the leaves of the canopy. We used MODIS 1-km resolution subset data sets (collection 5; http://daac.ornl.gov/MODIS/), each of which consisted of 7-by-7 km regions centered on the flux towers. At each time step, we averaged the MODIS observations by only using high-quality pixels (with the mandatory quality assurance – QA – flag being good in the QA data) based on the method of Yang et al. (2007) and Ichii et al. (2010), and missing data were replaced by a long-term average calculated using high-quality pixels. The original eight days composite products were converted to monthly averages during study period for each site, although LAI for TSE is that only in 2010.

We also determined the following phenological indices for each site; start (SG) and end (EG) day of the growing season, growing season length (GSL), growing season degree days (GSD), and degree days until SG (PGD). SG and EG was determined as the first and last day when GPP was continuously more than 1 g C m–2 d–1. GSL was determined as the day length between SG and EG. GSD and PGD were determined as the cumulative daily average air temperature above 5 ºC during GSL and until SG, respectively.

**3. Results and Discussion**

**3.1 Seasonal and intersite variation of carbon fluxes and MODIS LAI**

Seasonal variation of GPP, RE, and NEEfor eight larch forests are shown in Fig. 2. Here, we showed the max-min ranges of the interannual variation as shades to show the possible uncertainty caused by the different year’s observation. Photosynthesis began to increase in late May at the three Siberian sites (TUR, NLG, YLF) and the Mongolian site (SKT), whereas the increase began in late April at the other sites (Fig. 2). GPP reached its seasonal maximum during early to mid July at TUR, NLG, YLF, and SKT, whereas this occurred during early to mid June at LSH, TMK, and FHK. Thus, the start and peak of GPP at the Chinese and Japanese (except TSE) sites were about a month earlier than at the Siberian and Mongolian sites. TSE had a unique seasonal variation in GPP, which showed a gradual increase from May to July and a peak from July to August. This site was covered with dense *Sasa* dwarf bamboo and the contribution of larch to ecosystem leaf area was minor. Thus, the GPP seems to be strongly affected by the seasonal variation of *Sasa*, which developed new leaves from July to August and the LAI increased 1–3 months after that of the trees (Fukuzawa et al. 2007). On the other hand, RE was maximized from late July to early August at all study sites owing to the seasonal maximum temperature during that period. As a result, a high sequestration rate (minimum NEE) was observed in June at most of the study sites (Fig. 2).

MODIS LAI reached its seasonal maximum at similar period with that of GPP except LSH, TSE and FHK (Fig. 3). This discrepancy for the three sites may partly be owing to the different spatial representativeness between MODIS (up to 7 km) and flux observation (up to several hundred meters to kilometers).

Seasonal maximum daily GPP and RE ranged from 4.3 g C m−2 d−1 (TUR) to 20.0 g C m−2 d−1 (TMK) and from 3.1 g C m−2 d−1 (TUR) to 14.3 g C m−2 d−1 (LSH), respectively (Table 3). Seasonal minimum daily NEE (maximum CO2 absorption) ranged from −11.3 g C m−2 d−1 (TMK) to −2.1 g C m−2 d−1 (TUR). Annual GPP, RE, and NEE ranged from 234 g C m−2 yr−1 (TUR) to 1827 g C m−2 yr−1 (TMK), 145 g C m−2 yr−1 (TUR) to 1564 g C m−2 yr−1 (LSH), and −342 g C m−2 yr−1 (FHK) to 95 g C m−2 yr−1 (LSH), respectively.

GPP and RE increased exponentially with the increase in annual mean air temperature (*r*2=0.87, *p*<0.001 for GPP and *r*2=0.84, *p*<0.01 for RE) and linearly with the increase in seasonal maximum MODIS LAI of the site (*r*2=0.72, *p*<0.01 for GPP and *r*2=0.77, *p*<0.01 for RE) (Fig. 4). Except at the two larch plantations (LSH and TSE), net CO2 absorption rate (−NEE) tended to increase with the rise in annual mean air temperature or seasonal maximum LAI. Linear relationships were also observed between annual carbon fluxes (g C m-2 yr-1) and annual precipitation (Pr; mm yr-1) among study sites (GPP=0.90×Pr +310, RE=0.86×Pr +197, NEE=−0.11×Pr −141 excluding the two plantations (LSH and TSE)), however the coefficients of the determination (*r*2=0.67, *p*<0.05 for GPP, *r*2=0.61, *p*<0.05 for RE, *r*2=0.69, *p*<0.05 for NEE) were smaller than those for annual mean air temperature. There was no clear relationship (*r*2<0.12) between annual carbon fluxes and cumulative photosynthetic photon flux density(mol m-2) during the growing season (DOY153−257). Because we also found strong linear relationships of annual GPP and RE to SG (*r*2=0.94, *p*<0.001 for GPP and *r*2=0.99, *p*<0.001 for RE), GSL (*r*2=0.89, *p*<0.001 for GPP and *r*2=0.92, *p*<0.001 for RE), and GSD (*r*2=0.87, *p*<0.001 for GPP and *r*2=0.93, *p*<0.001 for RE) (Fig. 5), the GPP and RE were highly restricted by the length and temperature of the growing season, and the apparent relationships to mean annual temperature was likely observed. PGD, cumulative daily average air temperature above 5 ºC until SG, was not constant through the study sites and tended to increase with the delay in SG (Fig. 6). This implies that the larch forest requires more heat accumulation to start photosynthesis at colder region, and this may be owing to the permafrost.

Ueyama et al. (2013) also reported that the MODIS LAI is the best vegetation index to explain the spatial variation of GPP in Arctic and boreal ecosystems in Alaska, and they suggested that the inclusion of the understory leaves in the MODIS LAI estimation was the probable reason for the better performance to explain the intersite variation of photosynthetic capacity in Alaska, where the understory vegetation plays an important role in the total ecosystem photosynthesis, than other vegetation indices such as the normalized difference vegetation index (NDVI) or enhanced vegetation index (EVI) , which are corrected for the canopy background signal. Transfer functions from NDVI and EVI to LAI were different in different vegetation types (Street et al. 2007) and this would be another possible reason. However, we need to test the applicability for other ecosystems to confirm the universal applicability.

Hirata et al. (2008) and Chen et al. (2013) reported linear increase in GPP and exponential increases in RE, with the increase in the annual mean air temperature of the studied forests across East Asia. However, we obtained better correlation coefficients by exponential regression of both GPP and RE to the annual mean air temperature, similar to those reported by Saigusa et al. (2013), within the limited forest type and temperature range (from −9.4ºC (NLG) to 9.2ºC (FHK)).

Compared with the GPP and RE, it was difficult to find an apparent relationship between annual NEE and temperature or LAI (Figs 4 and 5), because of the two outliers (LSH and TSE). The TSE site was a 7-yr-old larch plantation after clear-cutting in 2003, when data were acquired, and former *Sasa* undergrowth still strongly affected the carbon fluxes. The LSH site is also a relatively young plantation (35 yr old) compared with other study sites (>45 yr old at TMK), and the carbon fluxes have possible uncertainty caused by the complex terrain. Although the annual GPP and RE increased with the stand age at the first stage of the stand development (< 50 years old), these tended to decrease with the stand age (Fig. 7), therefore, the disturbance history may partly affect the relationship of NEE to temperature or LAI, as suggested by process-based ecosystem model studies (Ueyama et al. 2010; Ichii et al. 2013). However, the effects of other environmental factors are included in this apparent relationship and it is difficult to distinguish these effects in our bulk analyses, thus the age or management effect must be clarified by the comparison among different-aged forest stands under similar environments in future studies.

**3.2 Ecosystem photosynthetic and respiratory parameters**

Seasonal variation of daily *A*max, , *R*d, *R*10, and *E*a for eight larch forests are shown in Fig. 8. Again, we showed the max-min range of the interannual variation to show the possible uncertainty caused by the different year’s observation. The two photosynthetic parameters (*A*max and ) showed peaks from late June to early July and gradually decreased thereafter at all the sites except the young plantation dominated by *Sasa* (TSE). Seasonal maximum values of *A*max and  ranged from 5.9 µmol m−2 s−1 (TUR) to 45.2 µmol m−2 s−1 (TMK) and 0.025 mol mol−1 (TUR, NLG, and SKT) to 0.065 mol mol−1 (TMK), respectively (Table 4). The reference respiration rate (*R*10) showed seasonal variation similar to that of *A*max and , although an apparent decrease was observed from July to August at some sites (LSH and FHK). Compared with *R*10, a delayed increase was observed in the seasonal variation of the daytime respiration rate (*R*d). Because *R*d is a temperature-dependent parameter, it was likely enhanced by the temperature increase during July to August, although the respiratory parameter normalized by temperature (*R*10) tended to be suppressed by temperature increases at some sites (LSH and FHK). *E*a did not show clear seasonal and interannual variation, but decreased during midsummer at some sites (NLG, YLF, SKT, and TMK). The decrease in the ecosystem respiratory parameters can be caused by the hot and dry environment (Janssens and Pilegaard 2003) or the decreased plant respiratory activity (Liang et al. 2010), as observed in soil respiration studies. Seasonal maximum values of *R*d, *R*10, and *E*a ranged from 1.7 µmol m−2 s−1 (TUR) to 9.4 µmol m−2 s−1 (TSE), 1.1 µmol m−2 s−1 (TUR) to 6.6 µmol m−2 s−1 (TMK), and 1.9 kJ mol−1 (TUR) to 5.5 kJ mol−1 (FHK), respectively (Table 4).

We observed a linear or exponential increasing trend for seasonal maximum *A*max, , *R*d, and *R*10 with the increase in annual mean air temperature (*r*2=0.77, *p*<0.01 for *A*max, *r*2=0.83, *p*<0.01 for *R*d and *r*2=0.74, *p*<0.01 for *R*10) and seasonal maximum LAI (*r*2=0.73, *p*<0.01 for *A*max, *r*2=0.66, *p*<0.05 for , *r*2=0.78, *p*<0.01 for *R*d and *r*2=0.81, *p*<0.01 for *R*10) across the eight sites (Fig. 9). Because an increasing trend with temperature or LAI was observed not only for the carbon fluxes (GPP and RE), but also for the ecosystem photosynthetic and respiratory parameters, it is clear that the increase in GPP and RE along the latitudinal gradient was caused by the enhancement of vegetation activity (photosynthesis and respiration; biotic factor) through the increase in leaf (or whole vegetation) biomass as well as the increased temperature (abiotic factor), although the biomass itself also depends on the temperature. On the other hand, the temperature sensitivity of RE (*E*a) was likely independent of the temperature or LAI gradients of the study sites. Because four (*A*max, , *R*d, and *R*10) of the five parameters were proportional to the magnitude of seasonal maximum LAI, we divided the values of the parameters in Fig. 9 by the seasonal maximum of monthly MODIS LAI (parameters were normalized by the LAI) in order to cancel the biomass effect on these parameters (Fig. 10). Linear increase with the temperature was still observed for *A*max and *R*d, however such relationship disappeared for  and *R*10. It means that the abiotic factor (temperature) effect is dominant in the inter-site variation of *A*max, while such effect is not important in the variation of  and temperature normalized respiratory parameter (*R*10).

**4. Conclusions**

Temperature and MODIS LAI explained much of the spatial variation of GPP and RE of larch forests distributed over East Asia. Together, our findings indicate that the intersite variation of ecosystem photosynthetic and respiratory parameters of larch forests can be explained well by MODIS LAI, suggesting that the intersite variation in GPP and RE was caused not only by the temperature variation (abiotic factor), but also by the variation in the photosynthetic and respiration activity by vegetation (biotic factor) through the change in leaf (or whole vegetation) biomass, and the applicability of this index to ecosystem carbon cycle models.

**Acknowledgements**

This research was financially supported by the A3 Foresight Program (CarboEastAsia) of the Japan Society for the Promotion of Science, and in part by Grants-in-Aid for Scientific Research (no. 23255009 and 25241002) from the Ministry of Education, Culture, Sports, Science and Technology, Japan.

**References**

Abaimov AP, Lesinski JA, Martinsson O, Milyutin LI 1998: Variability and ecology of Siberian larch species. Swedish University of Agricultural Sciences: reports 43, Umeå, Sweden, 123 pp.

Aubinet M, Grelle A, Ibrom A et al. 2000: Estimates of the annual net carbon and water exchange of forests: the EUROFLUX methodology. Adv. Ecol. Res., 30, 113−175.

Chen Z, Yu G, Ge J et al. 2013: Temperature and precipitation control of the spatial variation of terrestrial ecosystem carbon exchange in the Asian region. Agric. For. Meteorol., 182/183, 266−276.

Demek J 1994: Global warming and permafrost in Eurasia: a catastrophic scenario. Geomorphology, 10, 317−329.

Dolman AJ, Maximov TC, Moors EJ, Maximov AP, Elbers JA, Kononov AV, Waterloo MJ, van der Molen MK 2004: Net ecosystem exchange of carbon dioxide and water vapor of far eastern Siberian larch (*Larix cajanderii*) on permafrost. Biogeosciences, 1, 133−146.

Dolman AJ, Maximov T, Ohta T 2008: Water and energy exchange in East Siberian forest: an introduction. Agric. For. Meteorol., 148, 1913–1915.

Eugster W, Senn W 1995: A cospectral correction model for measurement of turbulent NO2 flux. Boundary-Layer Meteorol., 74, 321–340.

Falge E, Baldocchi D, Olson R et al. 2001: Gap filling strategies for defensible annual sums of net ecosystem exchange. Agric. For. Meteorol., 107, 43−69.

Foken Th, Wichura B 1996: Tools for quality assessment of surface-based flux measurements. Agric. For. Meteorol., 78, 83−105.

Fukuzawa K, Shibata H, Takagi K, Satoh F, Koike T, Sasa K 2007: Vertical distribution and seasonal pattern of fine-root dynamics in a cool-temperate forest in northern Japan: implication of the understory vegetation, *Sasa* dwarf bamboo. Ecol. Res., 22, 485−495.

Gower ST, Richards JH 1990: Larches: deciduous conifers in an evergreen world. BioScience, 40, 818−826.

Groenendijk M, Dolman AJ, Ammann C et al. 2011a: Seasonal variation of photosynthetic model parameters and leaf area index from global Fluxnet eddy covariance data. J. Geophys. Res., 116, G04027, doi: 10.1029/2011JG001742.

Groenendijk M, Dolman AJ, van der Molen MK et al. 2011b: Assessing parameter variability in a photosynthesis model within and between plant functional types using global Fluxnet eddy covariance data. Agric. For. Meteorol., 151, 22−38.

Gunin PD, Vostokova EA, Dorofeyuk NI, Tarasov PE, Black CC 1999: Vegetation Dynamics of Mongolia. Springer, New York, 240pp.

Hignett P 1992: Corrections to temperature measurements with a sonic anemometer. Boundary-Layer Meteorol., 61, 175–187.

Hirano T, Hirata R, Fujinuma Y, Saigusa N, Yamamoto S, Harazono Y, Takada M, Inukai K, Inoue G 2003: CO2 and water vapor exchange of a larch forest in northern Japan. Tellus B, 55, 244–257.

Hirata R, Hirano T, Saigusa N, Fujinuma Y, Inukai K, Kitamori Y, Takahashi Y, Yamamoto S 2007: Seasonal and interannual variations in carbon dioxide exchange of a temperate larch forest. Agric. For. Meteorol., 147, 110−124.

Hirata R, Saigusa N, Yamamoto S et al. 2008: Spatial distribution of carbon balance in forest ecosystems across East Asia. Agric. For. Meteorol., 148, 761−775.

Ichii K, Suzuki T, Kato T et al. 2010: Multi-model analysis of terrestrial carbon cycles in Japan: limitation and implications of model calibration using eddy flux observations. Biogeosciences, 7, 2061−2080.

Ichii K, Kondo M, Lee YH et al. 2013: Site-level model-data synthesis of terrestrial carbon fluxes in the CarboEastAsia eddy-covariance observation network: toward future modeling efforts. J. For. Res. Jpn., 18, 13−20.

Ide R, Nakaji T, Oguma H 2010: Assessment of canopy photosynthetic capacity and estimation of GPP by using spectral vegetation indices and the light-response function in a larch forest. Agric. For. Meteorol., 150, 389−398.

Janssens IA, Pilegaard K 2003: Large seasonal changes in *Q*10 of soil respiration in a beech forest. Global Change Biol., 9, 911−918.

Jiang YL, Zhou GS 2002: Carbon balance of *Larix gmelini* forest and impacts of management practices. Acta Phytoecologica Sinica, 26, 317–322.

Kaimal JC, Gaynor JE 1991: Another look at sonic thermometry. Boundary-Layer Meteorol., 56, 401–410.

Kormann R, Meixner FX 2001: An analytical footprint model for non-neutral stratification. Boundary-Layer Meteorol., 99, 207−224.

Kowalski S, Sartore M, Burlett R, Berbigier P, Loustau D 2003: The annual carbon budget of a French pine forest (*Pinus pinaster*) following harvest. Global Change Biol. 9, 1051–1065.

Leuning R, King KM 1992: Comparison of eddy-covariance measurements of CO2 fluxes by open- and closed-path CO2 analysers. Boundary-Layer Meteorol., 59, 297–311.

Li SG, Asanuma J, Kotani A, Eugster W, Davaa G, Oyunbaatar D, Sugita M 2005: Year-round measurements of net ecosystem CO2 flux over a montane larch forest in Mongolia. J. Geophys. Res., 110, D09303, doi: 10.1029/2004JD005453.

Liang N, Hirano T, Zheng ZM, Tang J, Fujinuma Y 2010: Soil CO2 efflux of a larch forest in northern Japan. Biogeosciences, 7, 3447–3457.

Lloyd J, Taylor JA 1994: On the temperature dependence of soil respiration. Funct. Ecol., 8, 315−323.

Machimura T, Kobayashi Y, Iwahana G, Hirano T, Lopez L, Fukuda M, Fedorov AN 2005: Change of carbon dioxide budget during three years after deforestation in eastern Siberian larch forest. J. Agric. Meteorol., 60, 653−656.

Machimura T, Iwahana G, Lopez L, Kobayashi Y, Okabe T, Yamada Y, Hirano T, Fukuda M, Fedorov AN 2008: Gross primary productivity, ecosystem respiration and net ecosystem exchange observed at a few intact and disturbed forests near Yakutsk, Eastern Siberia. Proceedings of International Workshop on Tropical Rain Forest and Boreal Forest Disturbance and Their Effects on Global Warming,Ulan Bator, Mongolia, 5−11.

McMillen RT 1988: An eddy correlation technique with extended applicability to non-simple terrain. Boudary-Layer Meteorol., 43, 231−245.

Mizoguchi Y, Miyata A, Ohtani Y, Hirata R, Yuta S 2009: A review of tower flux observation sites in Asia. J. For. Res. Jpn., 14, 1−9.

Moore CJ 1986: Frequency response corrections for eddy correlation systems. Boundary-Layer Meteorol., 37, 17–35.

Myneni RB, Hoffman S, Knyazikhim Y et al. 2002: Global products of vegetation leaf area and fraction absorbed PAR from year one of MODIS data. Remote Sens. Environ., 83, 214–231.

Nakai T, van der Molen MK, Gash JHC, Kodama Y 2006: Correction of sonic anemometer angle of attack errors. Agric. For. Meteorol., 136, 19–30.

Nakai Y, Matsuura Y, Kajimoto T, Abaimov AP, Yamamoto S, Zyryanova OA 2008: Eddy covariance CO2 flux above a Gmelin larch forest on continuous permafrost in Central Siberia during a growing season. Theor. Appl. Climatol., 93, 133–147.

Ohta T, Hiyama T, Tanaka H, Kuwada T, Maximov TC, Ohata T, Fukushima Y 2001: Seasonal variation in the energy and water exchanges above and below a larch forest in eastern Siberia. Hydrol. Process., 15, 1459–1476.

Ohta T, Maximov TC, Dolman AJ et al. 2008: Interannual variation of water balance and summer evapotranspiration in an eastern Siberian larch forest over a 7-year period (1998–2006). Agric. For. Meteorol., 148, 1941–1953.

Papale D, Reichstein M, Aubinet M et al. 2006: Towards a standardized processing of net ecosystem exchange measured with eddy covariance technique: algorithms and uncertainty estimation. Biogeosciences, 3, 571–583.

Reichstein M, Falge E, Baldocchi D et al. 2005: On the separation of net ecosystem exchange into assimilation and ecosystem respiration: review and improved algorithm. Global Change Biol., 11, 1424−1439.

Saigusa N, Li SG, Kwon H et al. 2013: Dataset of CarboEastAsia and uncertainties in the CO2 budget evaluation caused by different data processing. J. For. Res. Jpn., 18, 41−48.

Saito M, Maksyutov S, Hirata R, Richardson AD 2009: An empirical model simulating diurnal and seasonal CO2 flux for diverse vegetation types and climate conditions. Biogeosciences, 6, 585−599.

Sawamoto T, Hatano R, Shibuya M, Takahashi K, Isaev AP, Desyatkin RV, Maximov TC 2003: Changes in net ecosystem production associated with forest fire in taiga ecosystems, near Yakutsk, Russia. Soil Sci. Plant Nutr., 49, 493−501.

Schulze ED, Lloyd J, Kelliher FM et al. 1999: Productivity of forests in the Eurosiberian boreal region and their potential to act as a carbon sink: a synthesis. Global Change Biol., 5, 703−722.

Shimizu T, Suzuki M, Shimizu A 1999: Examination of a correction procedure for the flow attenuation in orthogonal sonic anemometers. Boundary-Layer Meteorol., 93, 227–236.

Street LE, Shaver, GR, Williams M, van Wijk MT 2007: What is the relationship between changes in canopy leaf area and changes in photosynthetic CO2 flux in arctic ecosystems? J. Ecol., 95, 139−150.

Takagi K, Lee D, Tamai K 2007: Report on the FLUXNET synthesis workshop 2007. AsiaFlux Newsletter, 21, 1−6.

Takagi K, Fukuzawa K, Liang N et al. 2009: Change in CO2 balance under a series of forestry activities in a cool-temperate mixed forest with dense undergrowth. Global Change Biol., 15, 1275–1288.

Ueyama M, Ichii K, Hirata R et al. 2010: Simulating carbon and water cycles of larch forests in East Asia by the BIOME-BGC model with AsiaFlux data. Biogeosciences, 7, 959–977.

Ueyama M, Hamotani K, Nishimura W, Takahashi Y, Saigusa N, Ide R 2012: Continuous measurement of methane flux over a larch forest using a relaxed eddy accumulation method. Theor. Appl. Climatol., 109, 461–472.

Ueyama M, Iwata H, Harazono Y, Euskirchen ES, Oechel WC, Zona D 2013: Growing season and spatial variations of carbon fluxes of Arctic and boreal ecosystems in Alaska (USA). Ecol. Appl., 23, 1798−1816.

Vickers D, Mahrt L 1997: Quality control and flux sampling problems for tower and aircraft data. J. Atmos. Ocean. Technol., 14, 512−526.

Wang H, Saigusa N, Zu Y, Yamamoto S, Kondo H, Yang F, Wang W, Hirano T, Fujinuma Y 2005a: Response of CO2 flux to environmental variables in two larch ecosystems in East Asia. Phyton-Ann. Rei. Bot. A, 45, 339−346.

Wang H, Zu Y, Saigusa N, Yamamoto S, Kondo H, Yang F, Wang W 2005b: CO2, water vapor and energy fluxes in a larch forest in northeast China. J. Agric. Meteorol., 60, 549−552.

Webb EK, Pearman GI, Leuning R 1980: Correction of flux measurements for density effects due to heat and water vapour transfer. Quart. J. Roy. Meteorol. Soc., 106, 85−100.

Wilczak JM, Oncley SP, Stage SA 2001: Sonic anemometer tilt correction algorithms. Boundary-Layer Meteorol., 99, 127–150.

Yang F, Ichii K, White MA, Hashimoto H, Michaelis AR, Votava P, Zhu AX, Huete A, Running SW, Nemani RR 2007: Developing a continental-scale measure of gross primary production by combining MODIS and AmeriFlux data through Support Vector Machine approach. Remote Sens. Environ., 110, 109–122.

**Table 1**

**Table 2**

**Table 3**

**Table 4**

**Figure legends**

**Figure 1** Location of studied larch forests. Refer to Table 1 for each site code.

**Figure 2** Seasonal variation of daily gross primary production (GPP), total ecosystem respiration (RE), and net ecosystem CO2 exchange (NEE)for eight larch forests. The max-min range of interannual variation is shown for sites with multiple years of observation. Refer to Table 1 for each site code.

**Figure 3** Seasonal variation of monthly MODIS LAI (MOD15A2) for eight larch forests. The max-min range of interannual variation is shown for sites with multiple years of observation, although LAI for TSE is that only in 2010. Refer to Table 1 for each site code.

**Figure 4** Relationship of annual gross primary production (GPP), total ecosystem respiration (RE), and net ecosystem CO2 exchange (NEE) with annual mean air temperature (*T*a) and seasonal maximum of monthly MODIS LAI (MOD15A2). The average and the max-min range of interannual variation of carbon fluxes are shown as symbols and bars, respectively for sites with multiple years of observation. Regression equation between NEE and *T*a or LAI was obtained while excluding two larch plantations (LSH and TSE). Refer to Table 1 for each site code.

**Figure 5** Relationship of annual gross primary production (GPP), total ecosystem respiration (RE), and net ecosystem CO2 exchange (NEE) with start day of the growing season (SG; left), growing season length (GSL; middle), growing season degree days (GSD; right). The average and the max-min range of interannual variation of carbon fluxes and phenological indices are shown as symbols and bars, respectively for sites with multiple years of observation.

**Figure 6** Relationship between start day of the growing season (SG) and degree days until SG (PGD) for each site. The average and the max-min range of interannual variation of phenological indices are shown as symbols and bars, respectively for sites with multiple years of observation. Refer to Table 1 for each site code.

**Figure 7** Relationship of annual gross primary production (GPP), total ecosystem respiration (RE), and net ecosystem CO2 exchange (NEE) with the stand age. The average and the max-min range of interannual variation of carbon fluxes are shown as symbols and bars, respectively for sites with multiple years of observation. Refer to Table 1 for each site code.

**Figure 8** Seasonal variation of daily *A*max (maximum gross primary production at light saturation),  (initial slope of the light-response curve), *R*d (daytime respiration), *R*10 (total ecosystem respiration at the reference temperature of 10ºC), and *E*a (apparent temperature sensitivity of RE) for eight larch forests. The max-min range of interannual variation of the daily values is shown for sites with multiple years of observation. Refer to Table 1 for each site code.

**Figure 9** Relationship of seasonal maximum daily *A*max (maximum gross primary production at light saturation),  (initial slope of the light-response curve), *R*d (daytime respiration), *R*10 (total ecosystem respiration at the reference temperature of 10ºC), and *E*a (apparent temperature sensitivity) with annual mean air temperature and seasonal maximum of monthly MODIS LAI (MOD15A2). Seasonal maximum values for each photosynthetic and respiratory parameter were determined by averaging the top 10 daily values. The average and the max-min range of interannual variation are shown as symbols and bars, respectively, for sites with multiple years of observation. Refer to Table 1 for each site code.

**Figure 10** Same as Figure 9, but all parameters were divided by the seasonal maximum of monthly MODIS LAI (normalized by LAI).
